# Supplementary material for: Chromogenic and fluorescence sensing of pH with a Schiff-base molecule
Source: Royal Society of Chemistry journal article supplement (doi:10.1039/c6ra06284a), 2016-01-01
Supplement: c6ra06284a1.pdf [file c6ra06284a1.pdf]

**Supplementary Information**

**Chromogenic and fluorescence sensing of pH with a Schiff-base molecule<sup>†</sup>**

Shibashis Halder<sup>a</sup>, Aradhita Bhattacharjee<sup>a</sup>, Ankita Roy<sup>a</sup>, Sompriya Chatterjee<sup>a,b</sup> and Partha Roy<sup>a,\*</sup>

<sup>a</sup> Department of Chemistry, Jadavpur University, Jadavpur, Kolkata-700 032, India

E-mail: proy@chemistry.jdvu.ac.in; Tel: +91-33-2457-2970; Fax: +91-33-2414-6414

<sup>b</sup> Department of Pharmaceutical Technology, NSHM Knowledge Campus, 124, B.L. Saha Road, Kolkata-700 053, India

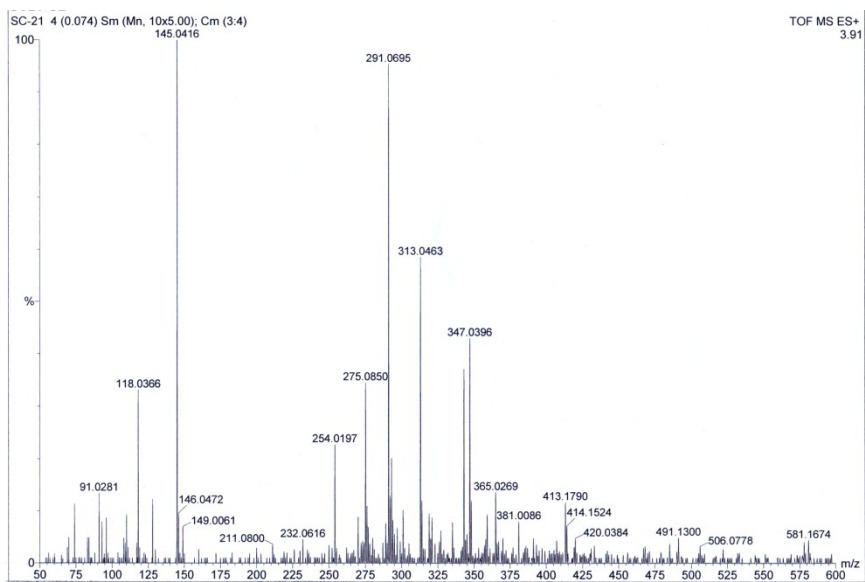

Fig. s1: Mass spectrum of HMQB

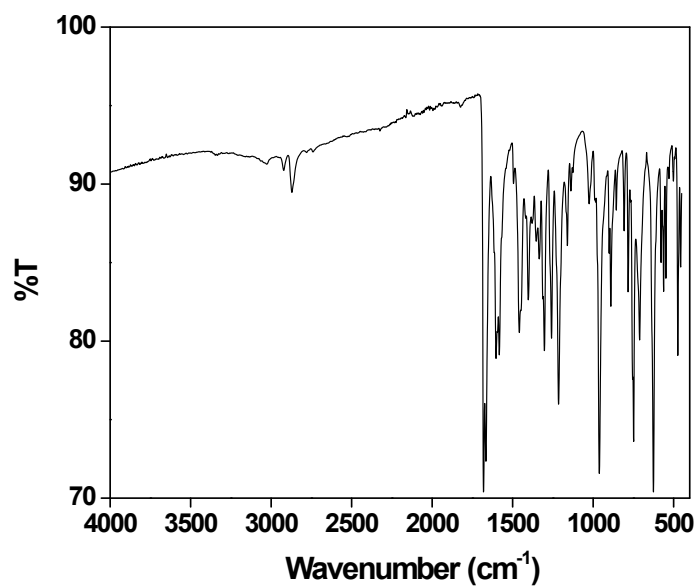

Fig. s2: FT-IR spectrum of HMQB

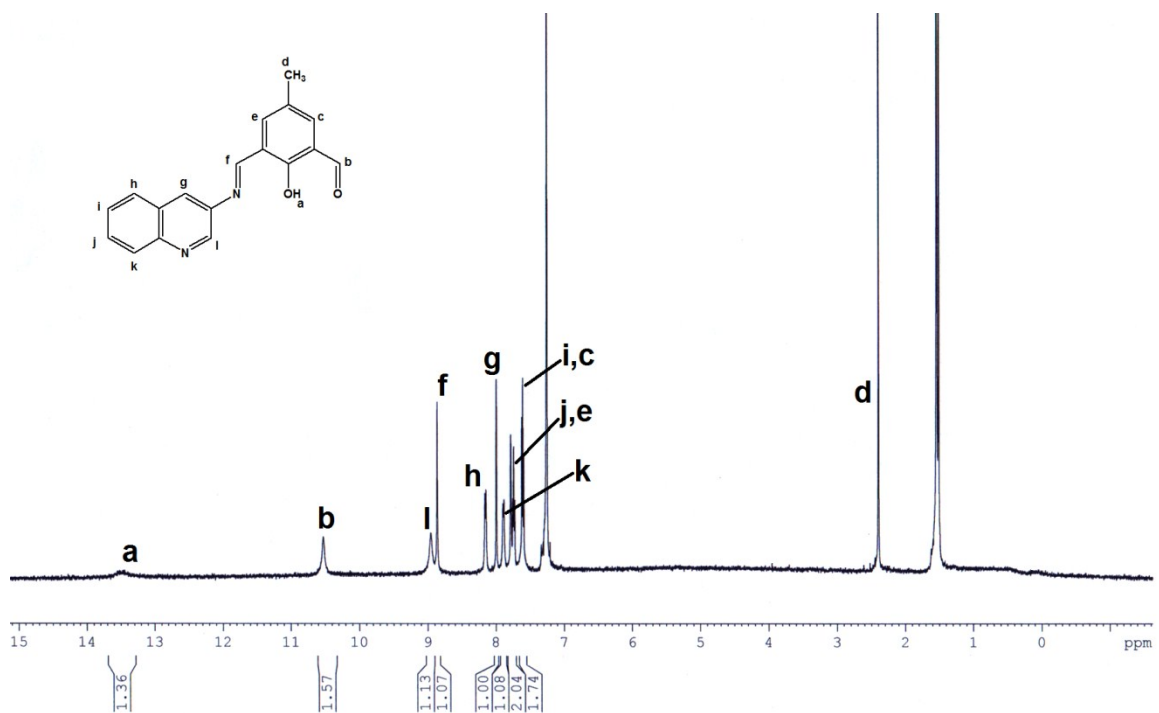

Fig. s3: <sup>1</sup>H NMR spectrum of HMQB in CDCl<sub>3</sub>

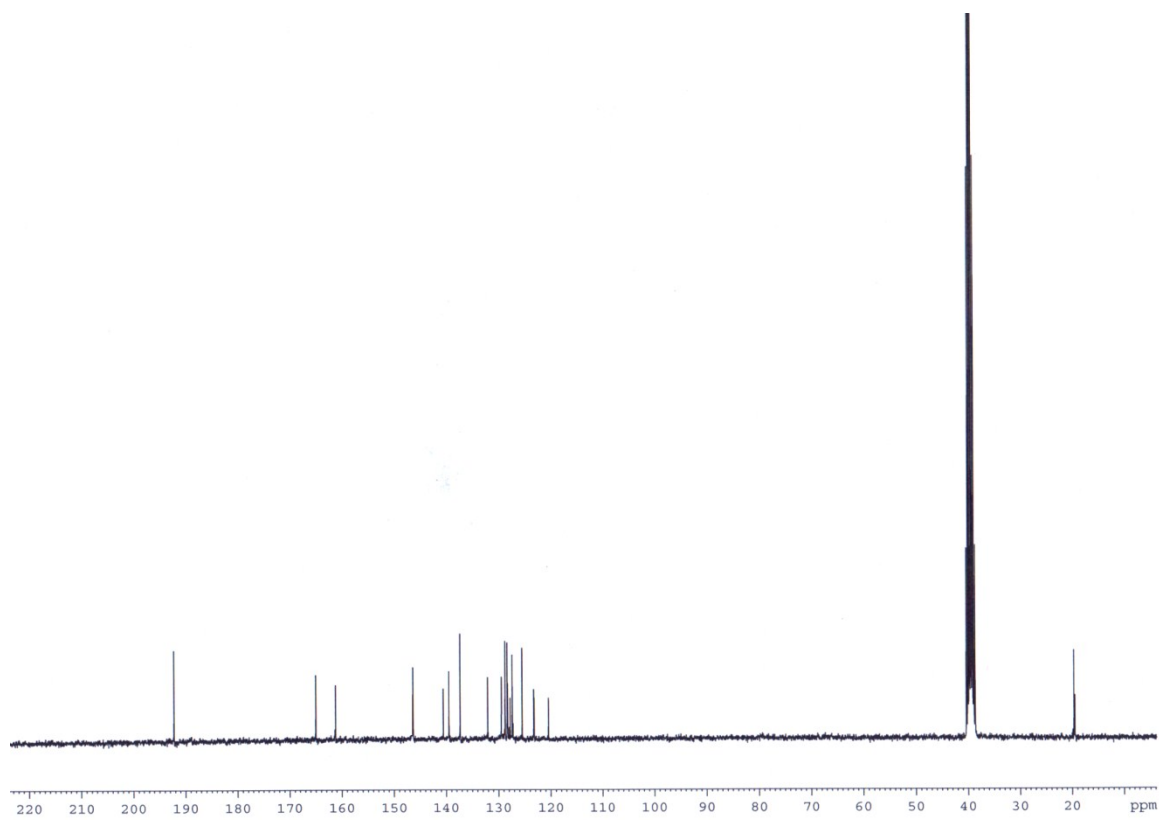

Fig. s4: <sup>13</sup>C NMR spectrum of HMQB in DMSO-d<sub>6</sub>

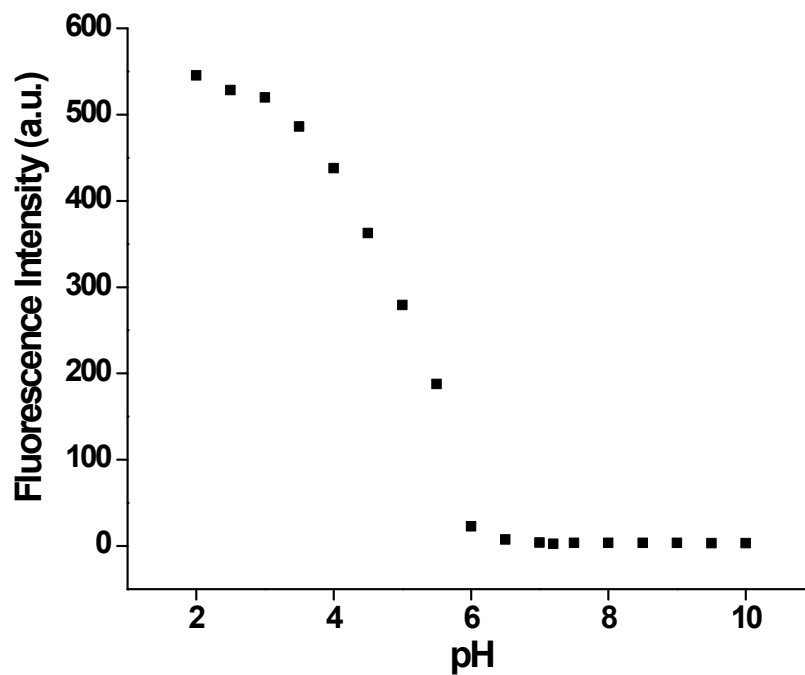

Fig. s5: The plot of emission intensities at 464 nm vs pH of the medium

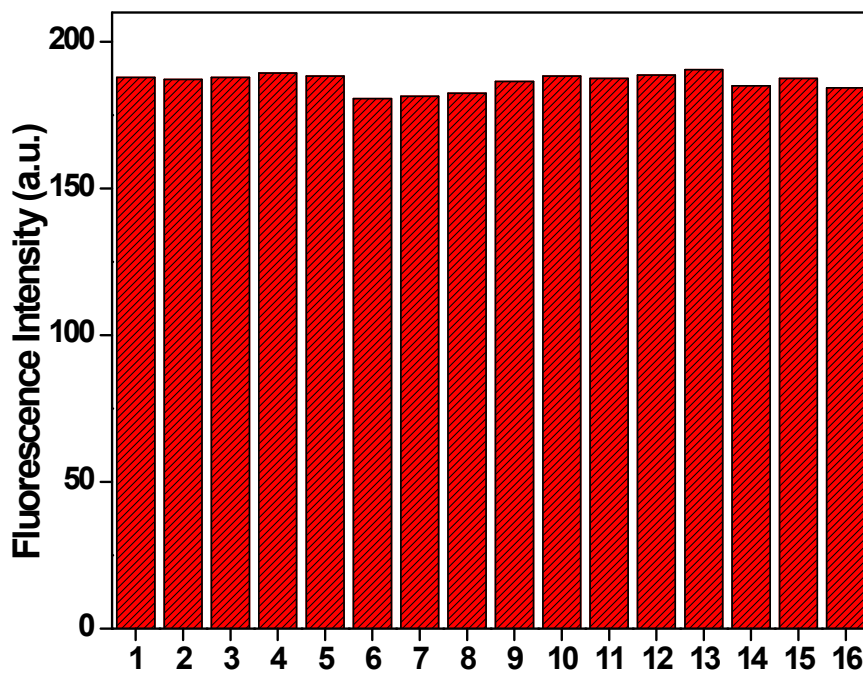

Fig. s6: Fluorescence intensity of (1) HMQB and HMQB in the presence of (2) Na<sup>+</sup>, (3) K<sup>+</sup>, (4) Zn<sup>2+</sup>, (5) Mg<sup>2+</sup>, (6) Cu<sup>2+</sup>, (7) Mn<sup>2+</sup>, (8) Fe<sup>3+</sup>, (9) Co<sup>2+</sup>, (10) Ca<sup>2+</sup>, (11) Ni<sup>2+</sup>, (12) NO<sub>3</sub><sup>-</sup>, (13) Cl<sup>-</sup>, (14) SO<sub>4</sub><sup>2-</sup>, (15) PO<sub>4</sub><sup>3-</sup> and (16) BO<sub>3</sub><sup>3-</sup> at pH 5.0

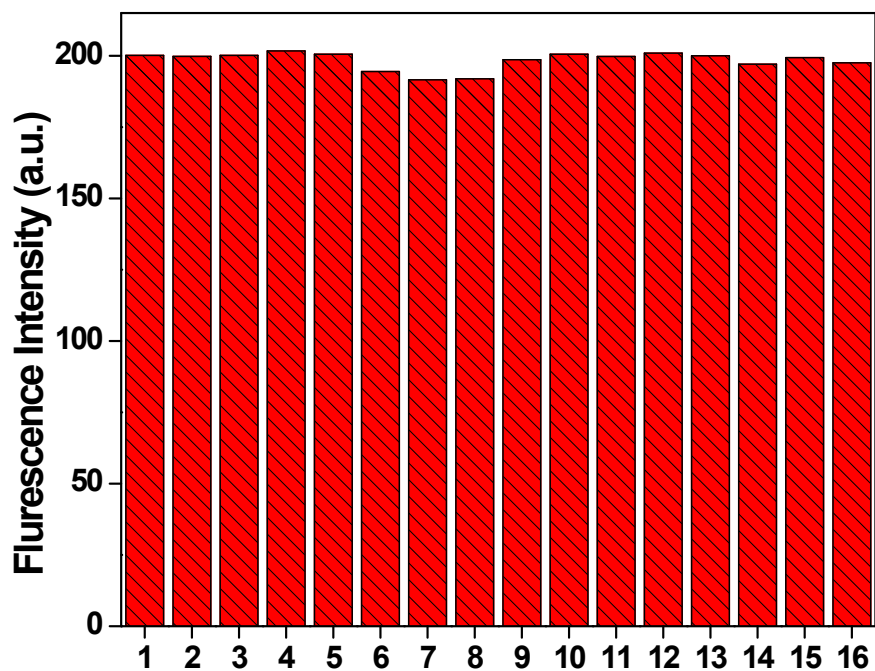

Fig. s7: Fluorescence intensity of (1) HMQB and HMQB in the presence of (2) Na<sup>+</sup>, (3) K<sup>+</sup>, (4) Zn<sup>2+</sup>, (5) Mg<sup>2+</sup>, (6) Cu<sup>2+</sup>, (7) Mn<sup>2+</sup>, (8) Fe<sup>3+</sup>, (9) Co<sup>2+</sup>, (10) Ca<sup>2+</sup>, (11) Ni<sup>2+</sup>, (12) NO<sub>3</sub><sup>-</sup>, (13) Cl<sup>-</sup>, (14) SO<sub>4</sub><sup>2-</sup>, (15) PO<sub>4</sub><sup>3-</sup> and (16) BO<sub>3</sub><sup>3-</sup> at pH 8.0

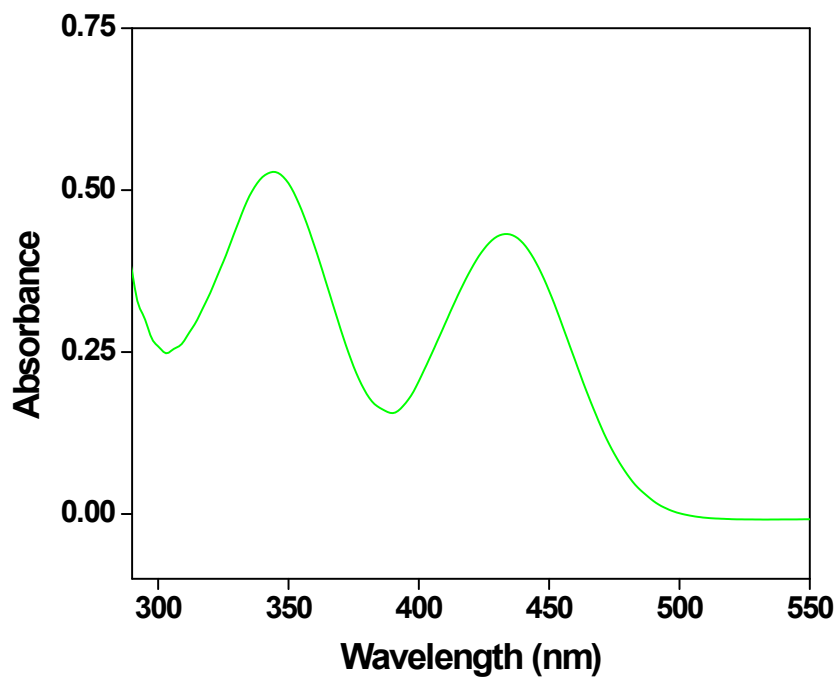

Fig. s8: UV-visible spectrum of HMQB ( $1 \times 10^{-4}$  M) in water of river Ganga at room temperature

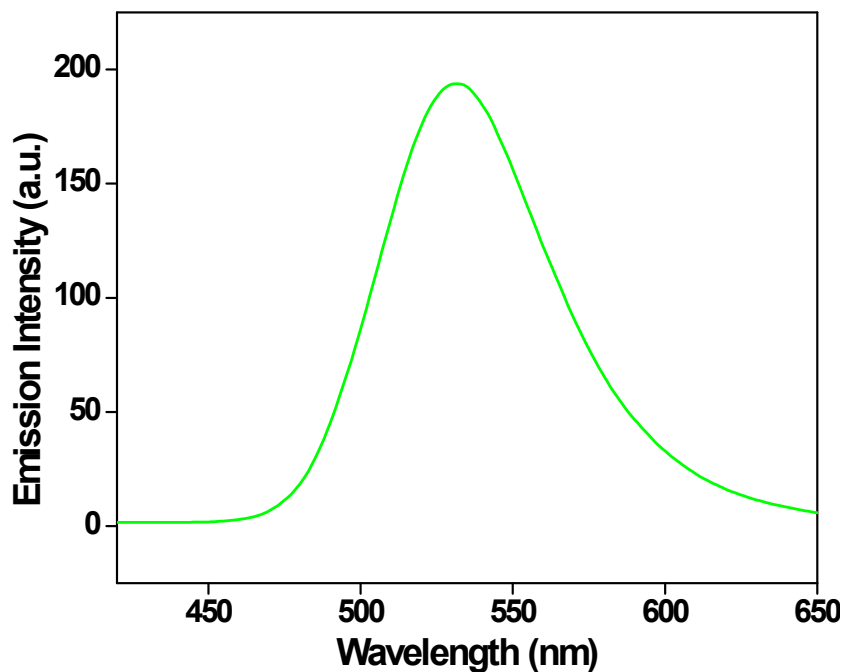

Fig. s9: Fluorescence spectrum of HMQB ( $1 \times 10^{-4}$  M) in water of river Ganga at room temperature

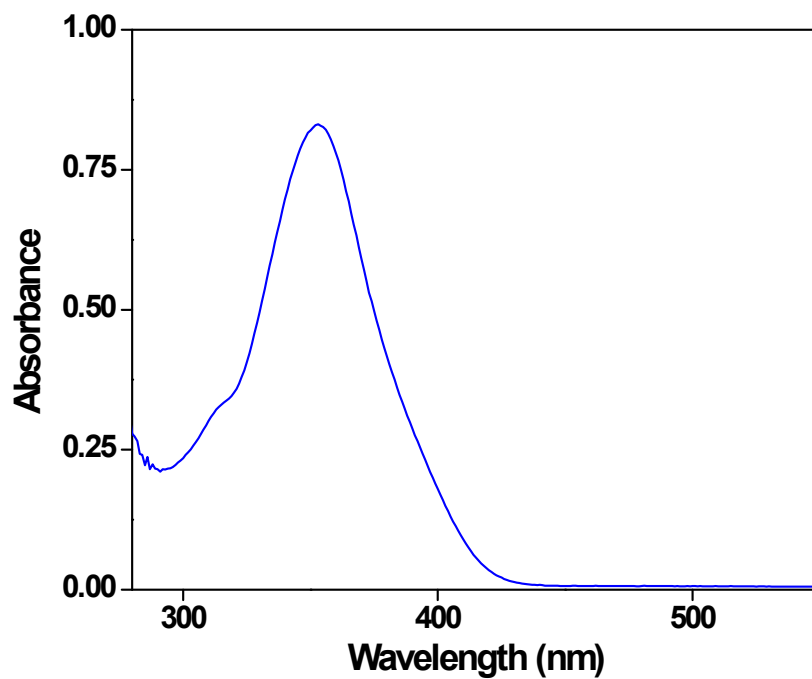

Fig. s10: UV-visible spectrum of HMQB ( $1 \times 10^{-4}$  M) in lemon juice at room temperature

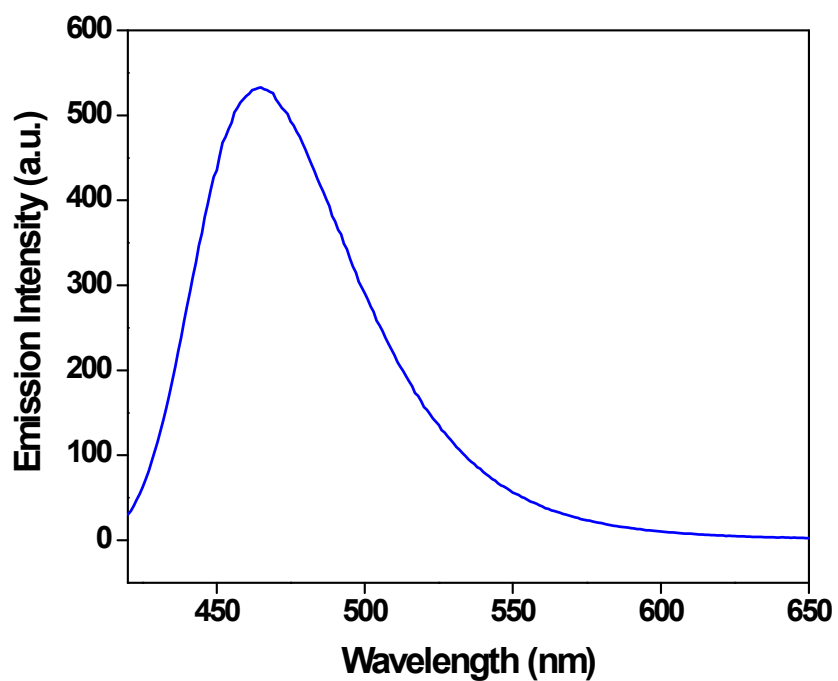

Fig. s11: Fluorescence spectrum of HMQB ( $1 \times 10^{-4}$  M) in lemon juice at room temperature

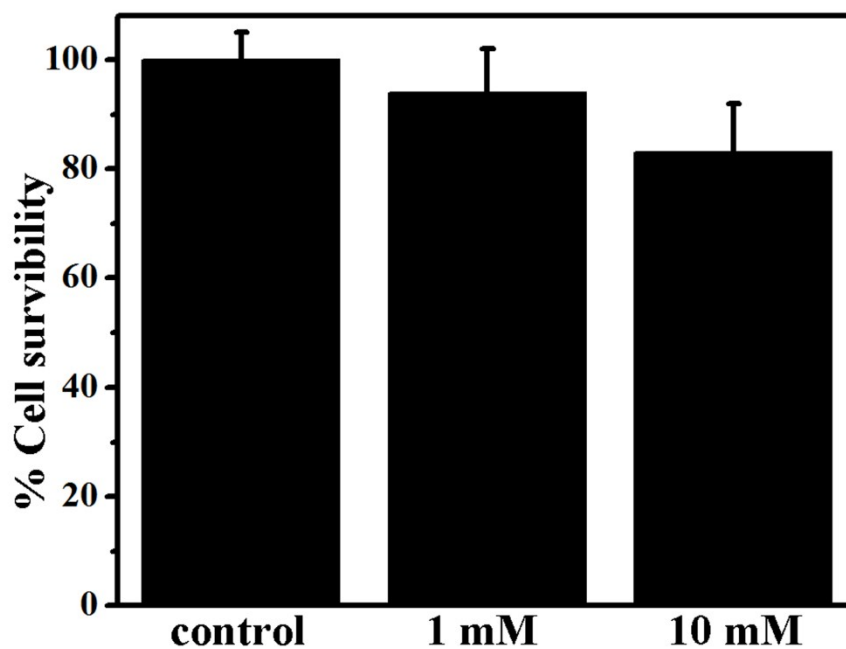

Fig. s12: % cell viability of HeLa cells treated with different concentrations (1 mM and 10 mM) of HMQB for 12 h determined by MTT assay. Results are given here as mean  $\pm$  S.D. of three independent experiments.
